# Supplementary material
Source: PubMed Central journal article supplement (PMC6252056)
Supplement: NIHMS996349-supplement-1.pdf [file NIHMS996349-supplement-1.pdf]

## **SUPPLEMENTARY MATERIALS**

**Supplementary Table 1. Trends in the therapeutic parameters**

|                           | <b>Omega-3 (+) (N = 30)</b> | <b>Omega-3 (-) (N =136)</b> | <b>p value</b> |
|---------------------------|-----------------------------|-----------------------------|----------------|
| <i>At follow-up start</i> |                             |                             |                |
| PT-INR                    | 2.0 (1.8, 2.5)              | 2.2 (1.9, 2.6)              | 0.07           |
| Aspirin dose, mg          | 81 (81, 162)                | 81 (81, 162)                | 0.67           |
| LVAD speed, rpm           |                             |                             |                |
| Axial LVAD                | 9037.5 ± 373.9              | 9130.5 ± 325.7              | 0.34           |
| Centrifugal LVAD          | 2625.0 ± 149.1              | 2672.2 ± 124.8              | 0.45           |
| ACEI or ARB               | 16                          | 54                          | 0.12           |
| Beta-blocker              | 15                          | 51                          | 0.15           |
| Aldosterone antagonist    | 16                          | 55                          | 0.14           |
| <i>At first month</i>     |                             |                             |                |
| PT-INR                    | 1.8 (1.5, 2.7)              | 2.1 (1.7, 2.5)              | 0.81           |
| Aspirin dose, mg          | 81 (81, 162)                | 81 (0, 81)                  | 0.16           |
| LVAD speed, rpm           |                             |                             |                |
| Axial LVAD                | 9137.5 ± 348.1              | 9166.7 ± 332.2              | 0.72           |
| Centrifugal LVAD          | 2656.0 ± 178.5              | 2673.0 ± 118.4              | 0.76           |
| ACEI or ARB               | 19                          | 66                          | 0.15           |
| Beta-blocker              | 20                          | 63                          | 0.07           |
| Aldosterone antagonist    | 18                          | 57                          | 0.08           |
| <i>At third months</i>    |                             |                             |                |
| PT-INR                    | 2.0 (1.3, 2.3)              | 2.1 (1.7, 2.7)              | 0.16           |

|                        |                |                |      |
|------------------------|----------------|----------------|------|
| Aspirin dose, mg       | 81 (81, 81)    | 81 (81, 162)   | 0.22 |
| LVAD speed, rpm        |                |                |      |
| Axial LVAD             | 9142.9 ± 276.6 | 9227.9 ± 379.3 | 0.46 |
| Centrifugal LVAD       | 2635.0 ± 166.0 | 2571.7 ± 218.7 | 0.77 |
| ACEI or ARB            | 18             | 70             | 0.41 |
| Beta-blocker           | 19             | 64             | 0.15 |
| Aldosterone antagonist | 17             | 55             | 0.14 |
| <i>At sixth months</i> |                |                |      |
| PT-INR                 | 2.0 (1.5, 2.2) | 2.0 (1.6, 2.3) | 0.81 |
| Aspirin dose, mg       | 81 (81, 325)   | 81 (81, 162)   | 0.10 |
| LVAD speed, rpm        |                |                |      |
| Axial LVAD             | 9184.6 ± 276.4 | 9252.5 ± 276.4 | 0.54 |
| Centrifugal LVAD       | 2745.0 ± 191.4 | 2659.2 ± 117.3 | 0.48 |
| ACEI or ARB            | 17             | 65             | 0.47 |
| Beta-blocker           | 18             | 69             | 0.24 |
| Aldosterone antagonist | 14             | 52             | 0.26 |

---

PT-INR, international ratio of prothrombin time; LVAD, left ventricular assist device; ACEI, angiotensin-converting enzyme inhibitor; ARB, angiotensin receptor blocker. \*p <0.05 by unpaired t-test or Mann-Whitney U test

**Supplementary Table 2. Comparison of baseline characteristics between background-matched groups**

|                                        | <b>Omega-3 (+)</b><br>(N = 27) | <b>Omega-3 (-)</b><br>(N = 54) | <b>P value</b> |
|----------------------------------------|--------------------------------|--------------------------------|----------------|
| <b><i>Demographics</i></b>             |                                |                                |                |
| Age, years                             | 49 (42, 59)                    | 48 (45, 58)                    | 0.83           |
| Body mass index                        | 32.4 (28.1, 35.7)              | 32.3 (28.0, 37.5)              | 0.58           |
| Male                                   | 23 (85%)                       | 42 (78%)                       | 0.32           |
| LVAD duration before the enrollment    | 24 (4, 68)                     | 21 (14, 28)                    | 0.07           |
| Destination therapy                    | 24 (89%)                       | 37 (69%)                       | 0.14           |
| Device                                 |                                |                                |                |
| Axial LVAD                             | 15 (56%)                       | 38 (70%)                       | 0.14           |
| Centrifugal LVAD                       | 12 (44%)                       | 16 (30%)                       | 0.14           |
| Temporary RVAD use                     | 2 (7%)                         | 3 (6%)                         | 0.74           |
| <b><i>Comorbidity</i></b>              |                                |                                |                |
| Ischemic etiology                      | 7 (26%)                        | 10 (19%)                       | 0.31           |
| Hypertension                           | 16 (59%)                       | 36 (67%)                       | 0.34           |
| Diabetes mellitus                      | 7 (26%)                        | 19 (35%)                       | 0.28           |
| Atrial fibrillation                    | 10 (37%)                       | 15 (28%)                       | 0.27           |
| History of stroke                      | 3 (11%)                        | 13 (24%)                       | 0.14           |
| History of ventricular tachyarrhythmia | 10 (37%)                       | 19 (35%)                       | 0.53           |
| Hemoglobin, g/dL                       | 9.78 ± 1.41                    | 9.60 ± 1.31                    | 0.66           |
| <b><i>At enrollment time</i></b>       |                                |                                |                |

|                        |                |                |      |
|------------------------|----------------|----------------|------|
| PT-INR                 | 2.1 (1.8, 2.4) | 2.4 (1.9, 2.7) | 0.07 |
| Aspirin dose, mg       | 81 (81, 162)   | 81 (81, 162)   | 0.94 |
| LVAD speed, rpm        |                |                |      |
| Axial LVAD             | 9014.3 ± 388.0 | 9186.5 ± 318.1 | 0.14 |
| Centrifugal LVAD       | 2625.0 ± 149.1 | 2701.5 ± 141.1 | 0.38 |
| ACEI or ARB            | 15 (56%)       | 22 (41%)       | 0.15 |
| Beta-blocker           | 13 (48%)       | 21 (39%)       | 0.29 |
| Aldosterone antagonist | 14 (52%)       | 22 (41%)       | 0.24 |

---

Abbreviations as in Table 1 and 2.

Propensity scores of age, gender, device type, and aspirin dose at discharge were matched between two groups.

# A. Age <60 years old

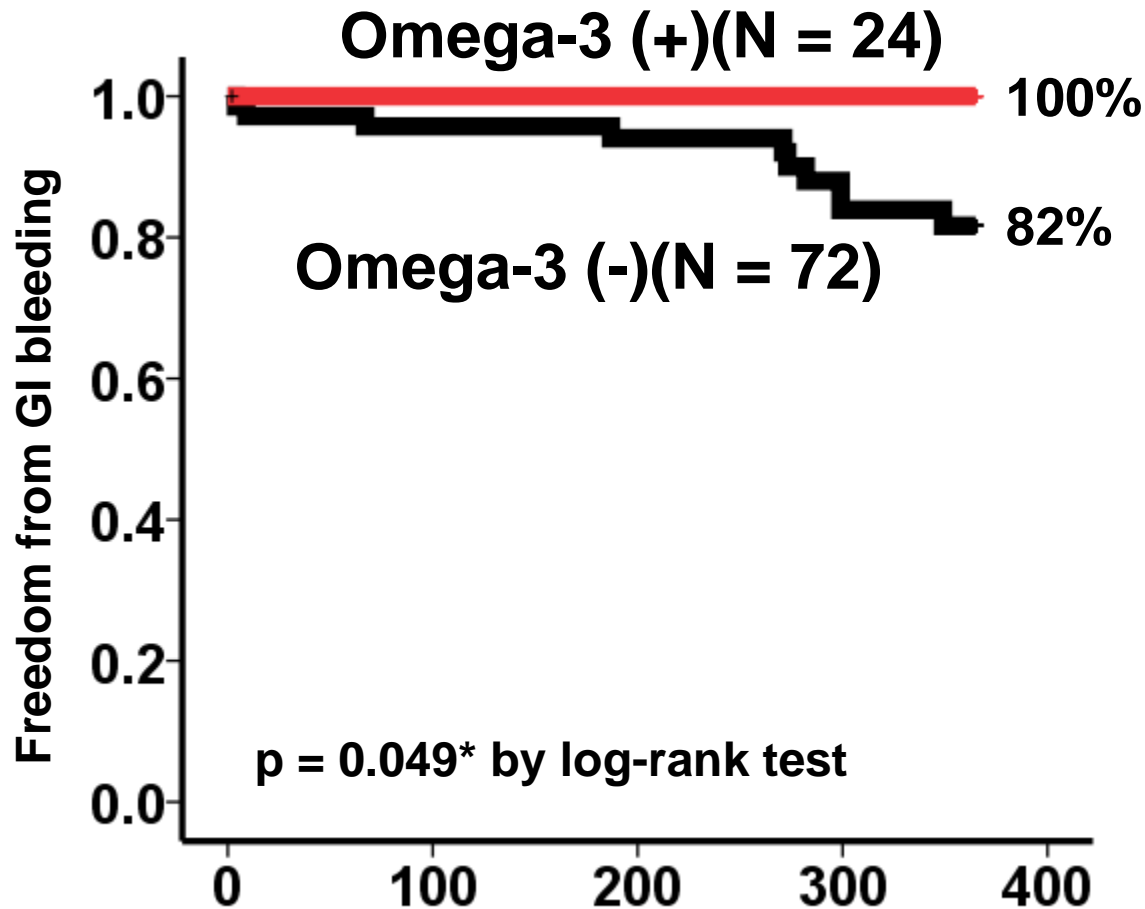

Number at risk

|              | 0  | 100 | 200 | 300 | 400 |
|--------------|----|-----|-----|-----|-----|
| Omega-3 (+): | 24 | 23  | 22  | 16  | 14  |
| Omega-3 (-): | 72 | 65  | 52  | 40  | 34  |

Supplementary Figure 1

## B. Age $\geq 60$ years old

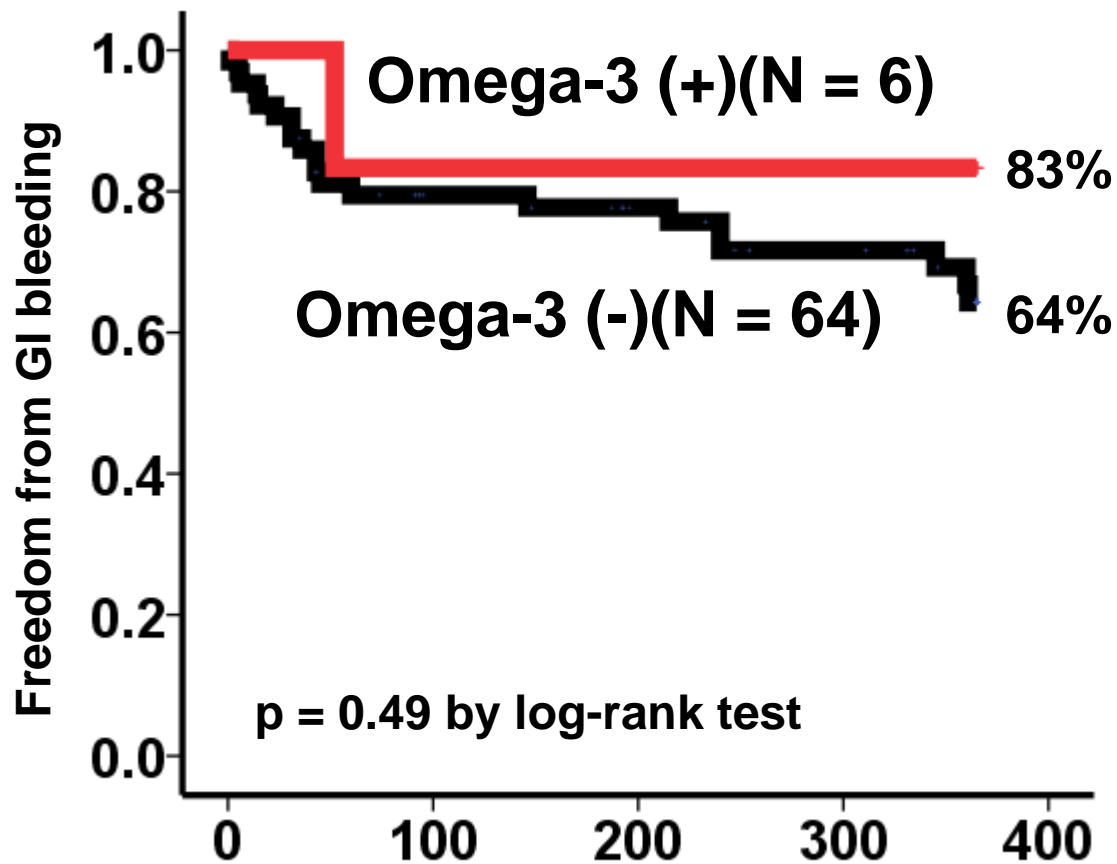

Number at risk

|              | 0  | 100 | 200 | 300 | 400 |
|--------------|----|-----|-----|-----|-----|
| Omega-3 (+): | 6  | 4   | 4   | 3   | 2   |
| Omega-3 (-): | 64 | 45  | 39  | 33  | 25  |

Supplementary Figure 1

## **FIGURE LEGEND OF SUPPLEMENTARY FIGURES**

**Supplementary Figure 1. Comparison of GI bleeding-free rate among the sub-group of age <60 years old (A) and age  $\geq$ 60 years old (B)**

\*p <0.05 by log-rank test.
